# Supplementary material
Source: PubMed Central journal article supplement (PMC2953559)
Supplement: NIHMS13871-supplement-01.pdf [file NIHMS13871-supplement-01.pdf]

## Supplemental materials

### Supplemental experimental procedures

#### Tissue culture, retroviral infections, cell death induction and apoptosis assays

Cell lines (FDC-P1: mouse myelomonocytic, MCF-7: breast epithelial, HeLa CCL-2: human cervical carcinoma, E $\mu$ -*myc* mouse B lymphoma, Phoenix Ecotropic packaging cells) and mouse embryonic fibroblasts (MEFs) were all cultured in Dulbecco's Modified Eagles (DME) medium supplemented with 10% fetal calf serum (FCS), and in some cases also with 250  $\mu$ M L-asparagine, 50  $\mu$ M 2-mercaptoethanol or 1,000 U/mL IL-3 (for FDC-P1 cells). MEFs used in some experiments (Fig. 1) were a gift from Dr S. Korsmeyer (Cheng *et al.*, 2001); other C57BL/6-derived MEFs have been described (Willis *et al.*, 2005). Bax/Bak DKO cells re-expressing HA-tagged Bax or Bak and FDC-P1 cells expressing FLAG-tagged Bcl-2 and Bcl-x<sub>L</sub> have been described (Huang *et al.*, 1997a; Willis *et al.*, 2005).

Cells expressing Noxa, Noxa3E, Bad, Bcl-2, Bcl-x<sub>L</sub>, Mcl-1 or A1 were generated by retrovirally infecting the cells with pMIG or pMIH retroviruses (Chen *et al.*, 2005). Retroviral constructs were transiently transfected into Phoenix Ecotropic packaging cells and viral supernatants were used to infect cells as described (Chen *et al.*, 2005). To allow infection of human cells, these cells were first transfected with an expression plasmid encoding mouse ecotropic retroviral receptor (gift of J. Silke) by nucleofection (Amaxa). Twenty-four hours later, the cells were infected with retroviruses (Noxa, Noxa 3E or RNAi constructs) that had been packaged in Phoenix cells, and the antibiotic-resistant (hygromycin or puromycin) cells were then expanded.

Cell death was induced by retroviral infection with constructs expressing BH3-only proteins (Chen *et al.*, 2005); by continuous exposure for the indicated times to HA14-1 (Calbiochem), BH3I-1 (Chembridge), Compound 6 (gift of K. Watson), Antimycin A (Sigma), Chelerythrine chloride (Calbiochem), Gossypol (Sigma), ABT-737 (Abbott Laboratories), Cytosine Arabinoside (Ara-C; Pharmacia), Etoposide (Pharmacia), Seliciclib (R-roscovitine/CYC202; Sigma) or Cycloheximide (Sigma); by 10 Gy  $\gamma$ -irradiation (provided by a <sup>60</sup>Co source); or by IL-3 deprivation of FDC-P1 cells (Vaux *et al.*, 1988). Cell viability was quantified by flow cytometric analysis of cells excluding 5  $\mu$ g/mL PI (Sigma) using a FACScan<sup>®</sup> (BD). At each time point, the assay was performed in triplicate on multiple independent clones of each genotype and the experiments repeated at least 3 times. In some experiments, the cells

were cultured in the presence of a broad-spectrum caspase inhibitor, 50  $\mu$ M zVAD.fmk (Bachem).

Long-term survival (colony) assays were performed by plating equal numbers of retrovirally infected cells and scoring for GFP<sup>+ve</sup> clones 6 d later (Chen et al., 2005). Equal numbers of cells in replicate wells were exposed to ABT-737 (1  $\mu$ M), HA14-1 (50  $\mu$ M) or Antimycin A (50  $\mu$ M); the media and drug were replenished after 72 h and scored for macroscopically visible colonies on day 7. The results are presented as a percentage of the number of colonies formed in the presence of drug relative to that in its absence.

### **Immunoblotting**

Cell lysates were prepared in lysis buffer (20 mM Tris-pH 7.4, 135 mM NaCl, 1.5 mM MgCl<sub>2</sub>, 1 mM EGTA, 10% glycerol) containing 1% Triton-X-100 (TX-100), supplemented with protease inhibitors (Roche or Sigma). Proteins were resolved by SDS:PAGE (Novex gels; Invitrogen), transferred onto nitrocellulose membranes and detected by immunoblotting using rat monoclonal anti-Bim (3C5; Alexis), -Apaf-1 (18H2, Alexis); hamster monoclonal anti-mouse Bcl-2 (3F11; BD); mouse monoclonal anti-HA (HA.11; CRP), -Bcl-2 (Bcl-2-100; (Pezzella et al., 1990); -Bax (2D2 and 5B7; Sigma), -Bak (Ab-1; Calbiochem), -HSP 70 (N6; gift of Drs. W. Welch and R. Anderson); rabbit polyclonal anti-Bak (B5929; Sigma), -mouse Mcl-1 (Rockland), -human Mcl-1 (554103; BD). Secondary antibodies included HRP-conjugated anti-rat IgG or anti-hamster IgG (SouthernBiotech), anti-mouse or anti-rabbit IgG (Chemicon); IRDye800-conjugated (Rockland) or AlexaFluor 680-conjugated (Molecular Probes) anti-rat, anti-mouse or anti-rabbit IgG antibodies. The proteins were detected by enhanced chemiluminescence (ECL; GE Healthcare) or using the Odyssey (Li-Cor) imaging system.

### **Affinity measurements and solution competition assays**

Affinity measurements using recombinant proteins (human except for mouse Mcl-1 and A1) were performed at room temperature on a Biacore 3000 biosensor as described (Chen et al., 2005); full-length human Bax was produced as described (Suzuki et al., 2000). As well as peptides previously described (Chen et al., 2005; Wilson-Annan et al., 2003), we used mouse NoxaBH3B (PADLKDECAQLRRIGDKVNLRQKLLN) and its E74F mutant (PADLKDFECAQLRRIGDKVNLRQKLLN; mutated residue underlined). Isothermal titration

calorimetry (ITC) was performed using a VP-ITC microcalorimeter (Microcal). Experiments were performed in 20 mM Tris pH 8.0, 150 mM NaCl, 1% DMSO, 1% Tween 20 at 25°C. Titrations consisted of 24 x 12  $\mu$ L injections of peptide or compound at 40  $\mu$ M into 1.34 mL of protein (5  $\mu$ M). The data were analyzed to fit to a one-site model using the Microcal software.

### **Flow cytometric analysis**

Transgene expression was confirmed by flow cytometric analysis, as previously described (Huang *et al.*, 1997b), or by immunoblotting of cell lysates. Cytochrome *c* release was assayed as described (Waterhouse *et al.*, 2004), using the mouse monoclonal anti-cytochrome *c* antibody 6H2.B4 (BD), and Bax activation was assessed using the mouse monoclonal anti-Bax clone 3 (BD) as described (Willis *et al.*, 2005). The samples were analyzed using a FACScan<sup>®</sup> (BD).

### ***In vitro* cytochrome *c* release assays**

Cells were pelleted and lysed in 0.05% digitonin containing lysis buffer (20 mM Hepes pH 7.2, 100 mM KCl, 5 mM MgCl<sub>2</sub>, 1 mM EDTA, 1 mM EGTA, 250 mM sucrose, supplemented with Complete Protease Inhibitor Cocktail from Roche). The crude lysates, containing mitochondria, were incubated with 0 or 5  $\mu$ M ABT-737 for 1 h at 30°C, then pelleted at 13,000 rpm at 4°C for 5 min. The supernatant was retained as the soluble (S) fraction while the pellet (P), which contains intact mitochondria, was solubilized in RIPA buffer.

### Supplemental references

- Chen, L., Willis, S. N., Wei, A., Smith, B. J., Fletcher, J. I., Hinds, M. G., Colman, P. M., Day, C. L., Adams, J. M., and Huang, D. C. S. (2005). Differential targeting of pro-survival Bcl-2 proteins by their BH3-only ligands allows complementary apoptotic function. *Mol Cell* *17*, 393-403.
- Cheng, E. H., Wei, M. C., Weiler, S., Flavell, R. A., Mak, T. W., Lindsten, T., and Korsmeyer, S. J. (2001). Bcl-2, Bcl-x<sub>L</sub> sequester BH3 domain-only molecules preventing Bax- and Bak-mediated mitochondrial apoptosis. *Mol Cell* *8*, 705-711.
- Day, C. L., Chen, L., Richardson, S. J., Harrison, P. J., Huang, D. C. S., and Hinds, M. G. (2005). Solution structure of prosurvival Mcl-1 and characterization of its binding by proapoptotic BH3-only ligands. *J Biol Chem* *280*, 4738-4744.
- Ekert, P. G., Read, S. H., Silke, J., Marsden, V. S., Kaufmann, H., Hawkins, C. J., Gerl, R., Kumar, S., and Vaux, D. L. (2004). Apaf-1 and caspase-9 accelerate apoptosis, but do not determine whether factor-deprived or drug-treated cells die. *J Cell Biol* *165*, 835-842.
- Hinds, M. G., Lackmann, M., Skea, G. L., Harrison, P. J., Huang, D. C. S., and Day, C. L. (2003). The structure of Bcl-w reveals a role for the C-terminal residues in modulating biological activity. *EMBO J* *22*, 1497-1507.
- Huang, D. C. S., Cory, S., and Strasser, A. (1997a). Bcl-2, Bcl-x<sub>L</sub> and adenovirus protein E1B19kD are functionally equivalent in their ability to inhibit cell death. *Oncogene* *14*, 405-414.
- Huang, D. C. S., O'Reilly, L. A., Strasser, A., and Cory, S. (1997b). The anti-apoptosis function of Bcl-2 can be genetically separated from its inhibitory effect on cell cycle entry. *EMBO J* *16*, 4628-4638.
- Pezzella, F., Tse, A. G. D., Cordell, J. L., Pulford, K. A. F., Gatter, K. C., and Mason, D. Y. (1990). Expression of the *bcl-2* oncogene protein is not specific for the 14;18 chromosomal translocation. *American Journal of Pathology* *137*, 225-232.
- Suzuki, M., Youle, R. J., and Tjandra, N. (2000). Structure of Bax: coregulation of dimer formation and intracellular localization. *Cell* *103*, 645-654.
- Vaux, D. L., Cory, S., and Adams, J. M. (1988). *Bcl-2* gene promotes haemopoietic cell survival and cooperates with *c-myc* to immortalize pre-B cells. *Nature* *335*, 440-442.
- Waterhouse, N. J., Steel, R., Kluck, R., and Trapani, J. A. (2004). Assaying cytochrome *c* translocation during apoptosis. *Methods Mol Biol* *284*, 307-313.
- Willis, S. N., Chen, L., Dewson, G., Wei, A., Naik, E., Fletcher, J. I., Adams, J. M., and Huang, D. C. (2005). Pro-apoptotic Bak is sequestered by Mcl-1 and Bcl-x<sub>L</sub>, but not Bcl-2, until displaced by BH3-only proteins. *Genes Dev* *19*, 1294-1305.
- Wilson-Annan, J., O'Reilly, L. A., Crawford, S. A., Hausmann, G., Beaumont, J. G., Parma, L. P., Chen, L., Lackmann, M., Lithgow, T., Hinds, M. G., *et al.* (2003). Proapoptotic BH3-only proteins trigger membrane integration of prosurvival Bcl-w and neutralize its activity. *J Cell Biol* *162*, 877-888.

Supplemental figures

VanDelft / Wei Fig. S1

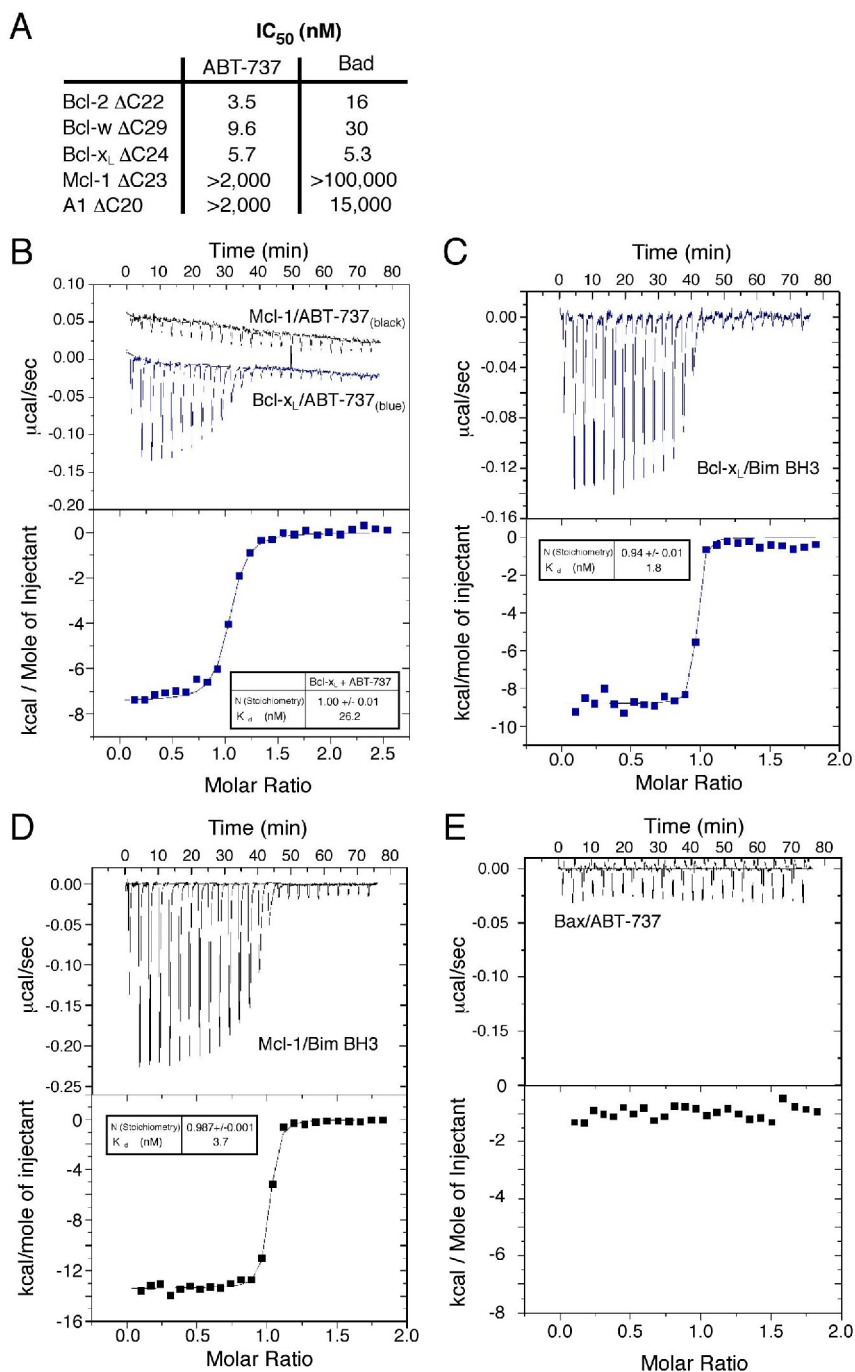

VanDelft / Wei Fig.S2

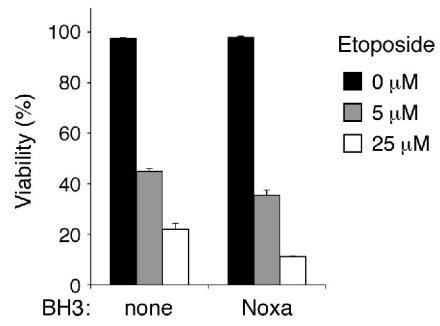

VanDelft / Wei Fig.S3

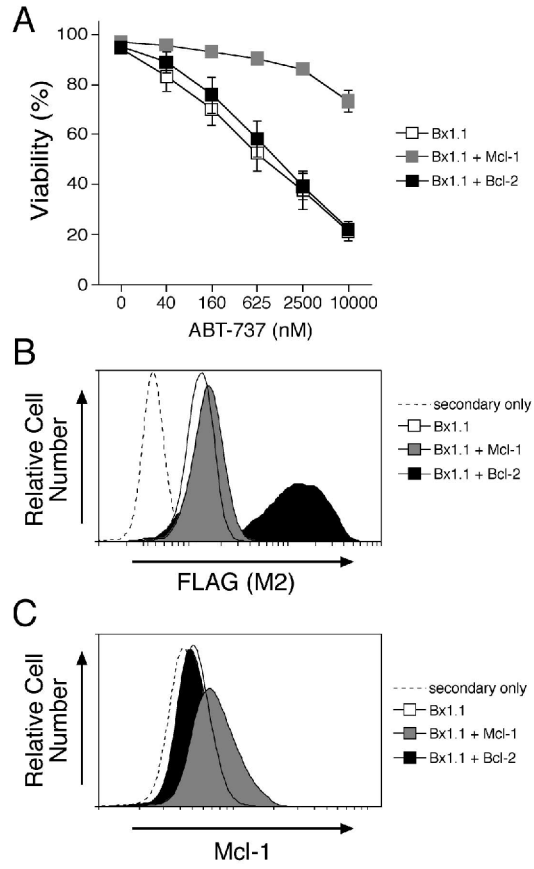

VanDelft / Wei Fig. S4

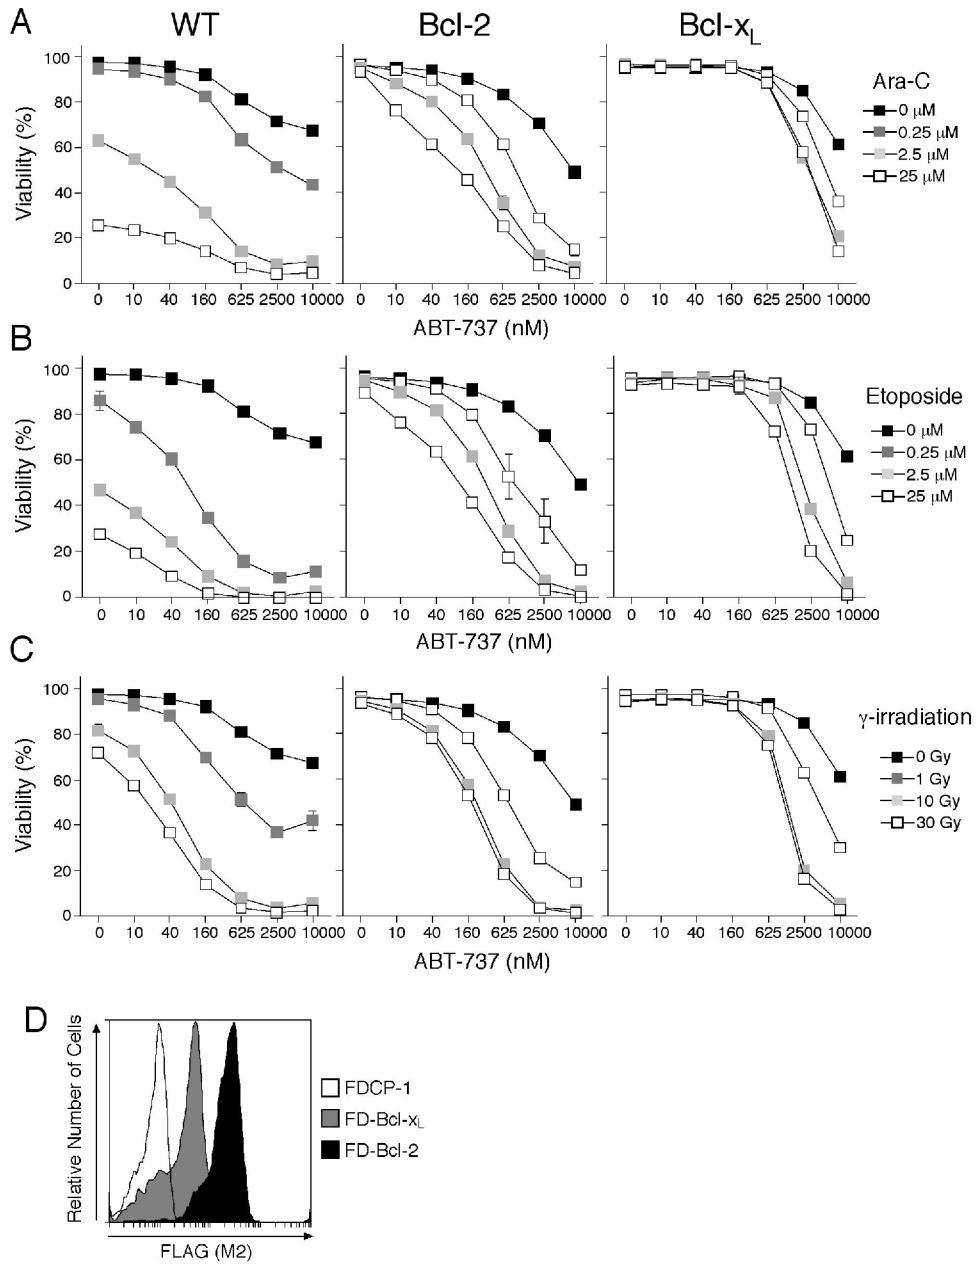



### Supplemental figure legends

#### Figure S1. ABT-737 binding to Bcl-2 family proteins

**A:** The relative affinities ( $IC_{50}$  in nM) of a BadBH3 peptide (as reported previously (Chen et al., 2005) and ABT-737 for mammalian pro-survival proteins. The affinities were determined in solution competition assays using pro-survival proteins that had been C-terminally truncated to facilitate their production in bacteria (Chen et al., 2005; Day et al., 2005; Hinds et al., 2003).

**B:** Tight stoichiometric (1:1) binding is observed between ABT-737 and Bcl-x<sub>L</sub> (blue), but none between ABT-737 and Mcl-1 (black), determined by isothermal titration calorimetry (ITC). The upper panels display the raw titration data. Each trough represents the heat absorbed during a single injection of ligand. The raw data for binding to Bcl-x<sub>L</sub> (blue) and Mcl-1 (black; offset by 0.05 cal mol<sup>-1</sup>) is displayed (upper panels). Each point on the curves in the lower panels represents the integration of the area of the inflection produced by each injection.

**C, D:** Tight binding of 26-mer Bim BH3 to Bcl-x<sub>L</sub> (C) and Mcl-1 (D).

**E:** No binding is detected between ABT-737 and Bax.

The insets show the kinetics and stoichiometry of binding as determined by ITC.

#### Figure S2. Viability of MEFs stably expressing Noxa

The viability (determined by PI uptake) of wild-type parental MEFs (left) or a sub-line stably expressing Noxa (right) left untreated, or 24 h after treatment with Etoposide (5 or 25 μM). Data represent means ± SD from 3 independent experiments.

#### Figure S3. Overexpression of Mcl-1, but not Bcl-2, confers resistance to ABT-737

**A:** The parental factor-dependent myeloid (FDM) cells (clone Bx1.1) (Ekert et al., 2004), or derivatives stably expressing FLAG-tagged Mcl-1 or Bcl-2, were treated with ABT-737 (0-10 μM) and their viability determined 24 h later. Data represent means ± SD from 3 independent experiments.

**B, C:** Overexpression of Mcl-1 or Bcl-2 in FDM cells. The flow cytometric analysis shows FDM (clone Bx1.1) cells stably expressing FLAG-tagged Mcl-1 (stippled) or Bcl-2 (black), which had been fixed, permeabilized and stained with (B) the mouse monoclonal anti-FLAG M2 antibody to allow direct comparison of Bcl-2 or Mcl-1 expression (detected using a FITC-conjugated goat anti-mouse antibody) or (C) the rat monoclonal anti-Mcl-1 antibody to allow comparison of

Mcl-1 overexpression relative to endogenous levels (detected using a FITC-conjugated goat anti-rat antibody). Unfilled histograms: staining of parental FDM cells.

**Figure S4.** Sensitization by ABT-737 to cytotoxic agents

**A-C:** The viability of parental FDC-P1 cells or derivative lines overexpressing Bcl-2 or Bcl-x<sub>L</sub> cells was determined 24 h after exposure to cytosine arabinoside (**A**, Ara-C; 0-25 μM), etoposide (**B**, 0-25 μM) or γ-irradiation (**C**, 0-30 Gy), in the absence or presence of ABT-737 (up to 10 μM).

**D:** Overexpression of Bcl-2 or Bcl-x<sub>L</sub> in FDC-P1 cells. Flow cytometric analysis of representative FDC-P1 clones stably expressing FLAG-tagged Bcl-2 (black) or Bcl-x<sub>L</sub> (stippled) which had been fixed, permeabilized and stained with the mouse monoclonal anti-FLAG M2 antibody, to allow direct comparison of Bcl-2 or Bcl-x<sub>L</sub> expression (detected using a FITC-conjugated goat anti-mouse antibody). Unfilled histogram: staining of parental FDC-P1 cells.

Data in **A-C** is from representative experiments.
